# Supplementary material for: Photocatalytic organic degradation over W-rich and Cu-rich CuWO4 under UV and visible light
Source: Royal Society of Chemistry journal article supplement (doi:10.1039/c4ra13952f), 2014-12-23
Supplement: c4ra13952f1.pdf [file c4ra13952f1.pdf]

## Electronic Supplementary Information

# Photocatalytic organic degradation over W-rich and Cu-rich $\text{CuWO}_4$ under UV and visible light

Haihang Chen, and Yiming Xu\*

State key Laboratory of Silicon Materials and Department of Chemistry, Zhejiang University,  
Hangzhou 310027, China

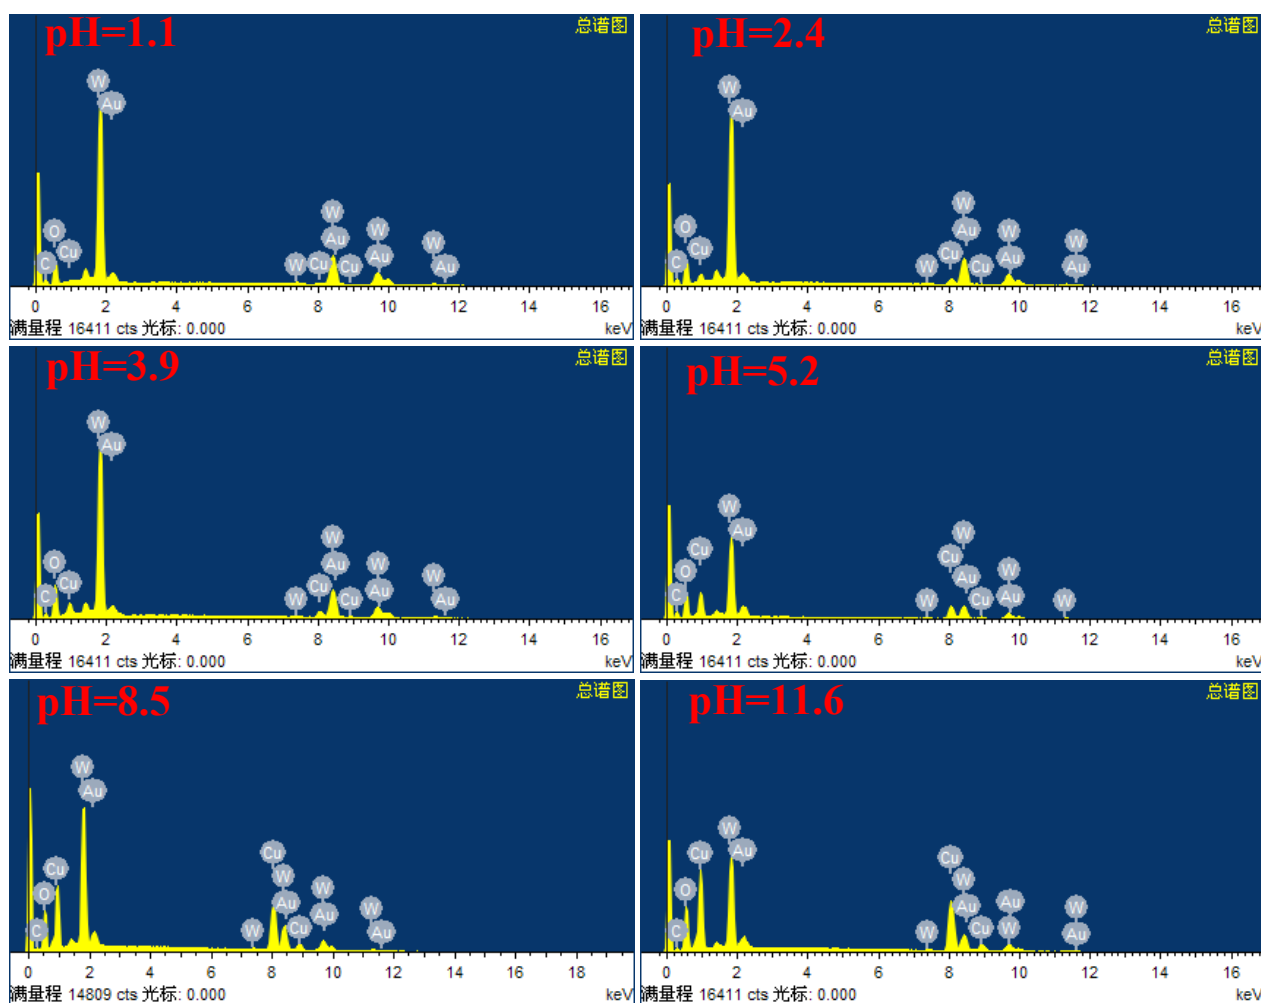

Fig. S1. EDS spectra of the samples prepared at different pHs.
